# Supplementary material for: Factors associated with anti-tumor necrosis factor effectiveness to prevent postoperative recurrence in Crohn’s disease
Source: PubMed Central journal article supplement — Intest Res. 2021 Aug 4;20(3):303–12. doi: 10.5217/ir.2021.00018 (PMC9344250; doi:10.5217/ir.2021.00018), 2021-08-04
Supplement: ir-2021-00018-suppl1.pdf [file ir-2021-00018-suppl1.pdf]

See “Factors associated with anti-tumor necrosis factor effectiveness to prevent postoperative recurrence in Crohn’s disease” on pages 303-312.

**Supplementary Table 1.** Risk Factors of Endoscopic Postoperative Recurrence in 117 Anti-TNF-Naïve Patients (Multivariable Analysis)

| Source                                        | OR (95% CI)          | P-value |
|-----------------------------------------------|----------------------|---------|
| Active smoker                                 | 1.168 (0.339–4.027)  | 0.806   |
| Perianal lesions                              | 0.561 (0.173–1.823)  | 0.337   |
| Prior bowel resection                         | 2.588 (1.024–6.542)  | 0.044   |
| Resection length > 30 cm                      | 1.524 (0.636–3.650)  | 0.345   |
| Surgery for refractoriness to medical therapy | 2.187 (0.099–48.292) | 0.620   |
| Metronidazole to prevent endoscopic POR       | 0.521 (0.110–2.476)  | 0.412   |
| Fistulizing phenotyp (B3)                     | 0.790 (0.318–1.963)  | 0.612   |
| Anti-TNF                                      | Reference            |         |
| 5-ASA/no medication                           | 5.224 (0.977–27.923) | 0.053   |
| Immunosuppressive therapy                     | 8.770 (1.752–43.902) | 0.008   |

TNF, tumor necrosis factor; OR, odds ratio; CI, confidence interval; POR, postoperative recurrence; 5-ASA, 5-aminosalicylates.
